# Supplementary material
Source: PubMed Central journal article supplement (PMC2936754)

## Supplementary Figures

Figure S1. **Generation of *iPLA<sub>2</sub>γ*<sup>-/-</sup> mice and comparison of body weights and lengths of WT and KO littermates over 4 months.** *A*, Diagram of the gene targeting of *iPLA<sub>2</sub>γ*. Details are described in Experimental Procedures. *B*, Q-PCR analysis of *iPLA<sub>2</sub>γ* (left), *iPLA<sub>2</sub>β* (middle) and *cPLA<sub>2</sub>α* (right) mRNA in skeletal muscle of wild-type (WT) and *iPLA<sub>2</sub>γ*<sup>-/-</sup> (KO) mice. Results are means ± S. E. (n = 7). \*\*, *p* < 0.05 vs. WT. *C*, Western blotting of skeletal muscle with an anti-*iPLA<sub>2</sub>γ* antibody ( $\alpha$ -tubulin was used as the loading control). The band indicated by an asterisk is nonspecific. *D*, time courses of the changes in body weight among male (*a*) and female (*b*) WT (male n = 14, female n = 7; closed triangles), *iPLA<sub>2</sub>γ* heterozygous (male n = 3, female n = 6; open squares), and *iPLA<sub>2</sub>γ*-KO (male n = 17, female n = 9; open circles) mice. *E*, time course of the changes in body lengths of male (*a*) and female (*b*) WT (male n = 8, female n = 6; closed triangles) and *iPLA<sub>2</sub>γ*-KO (male n = 10, female n = 9; open circles) mice. Results are means ± S. E. \*, *p* < 0.005 vs. WT.

Figure S2. **Histological analysis of thigh muscle from *iPLA<sub>2</sub>γ*-WT and -KO mice at the 1-month of age.** *A* (*a* and *b*), cross sections of thigh muscle from WT (*a*) and KO (*b*) mice were stained with hematoxylin and eosin. *B* (*a* to *d*), Electron microscopy of *iPLA<sub>2</sub>γ*-WT (*a* and *b*) and -KO skeletal muscle (*c* and *d*). Scale bar, 1  $\mu$ m (*a* and *c*) and 500 nm (*b* and *d*).

Figure S3. **Expression of inflammatory cytokines in WT and *iPLA<sub>2</sub>γ*-KO muscle.** Q-PCR analysis of the mRNA expression for IL-1 $\beta$ , IL-6, and TNF- $\alpha$  in skeletal muscles from WT and KO mice (n = 7). Quantitative data are means ± S. E.

Figure S4. **Primary cultures of myoblasts from *iPLA<sub>2</sub>γ*-WT and -KO mice.** *A*, cell morphology of myoblast cells from *iPLA<sub>2</sub>γ*-WT (*a* and *b*) and KO mice (*c* and *d*) after culture for 3 days under high-FCS (*a* and *c*) and low-HS (*b* and *d*) conditions. *B*, the number of myotubes after culture for 3 days under low-HS conditions. Quantitative data are means ± S. E. (n = 3). *C*, Western blot analysis with  $\alpha$ -actinin- and *iPLA<sub>2</sub>γ*-specific antibodies. An antibody against cPGES was used as a control of equal loading of the samples to each lane.

Video 1. **Muscle weakness in *iPLA<sub>2</sub>γ*-KO mice (1).** A WT or KO mouse at 4 months was placed on an upside-down beaker.

Video 2. **Muscle weakness in *iPLA<sub>2</sub>γ*-KO mice (2).** A WT or KO mouse at 4 months was placed on a wire net that was then turned upside

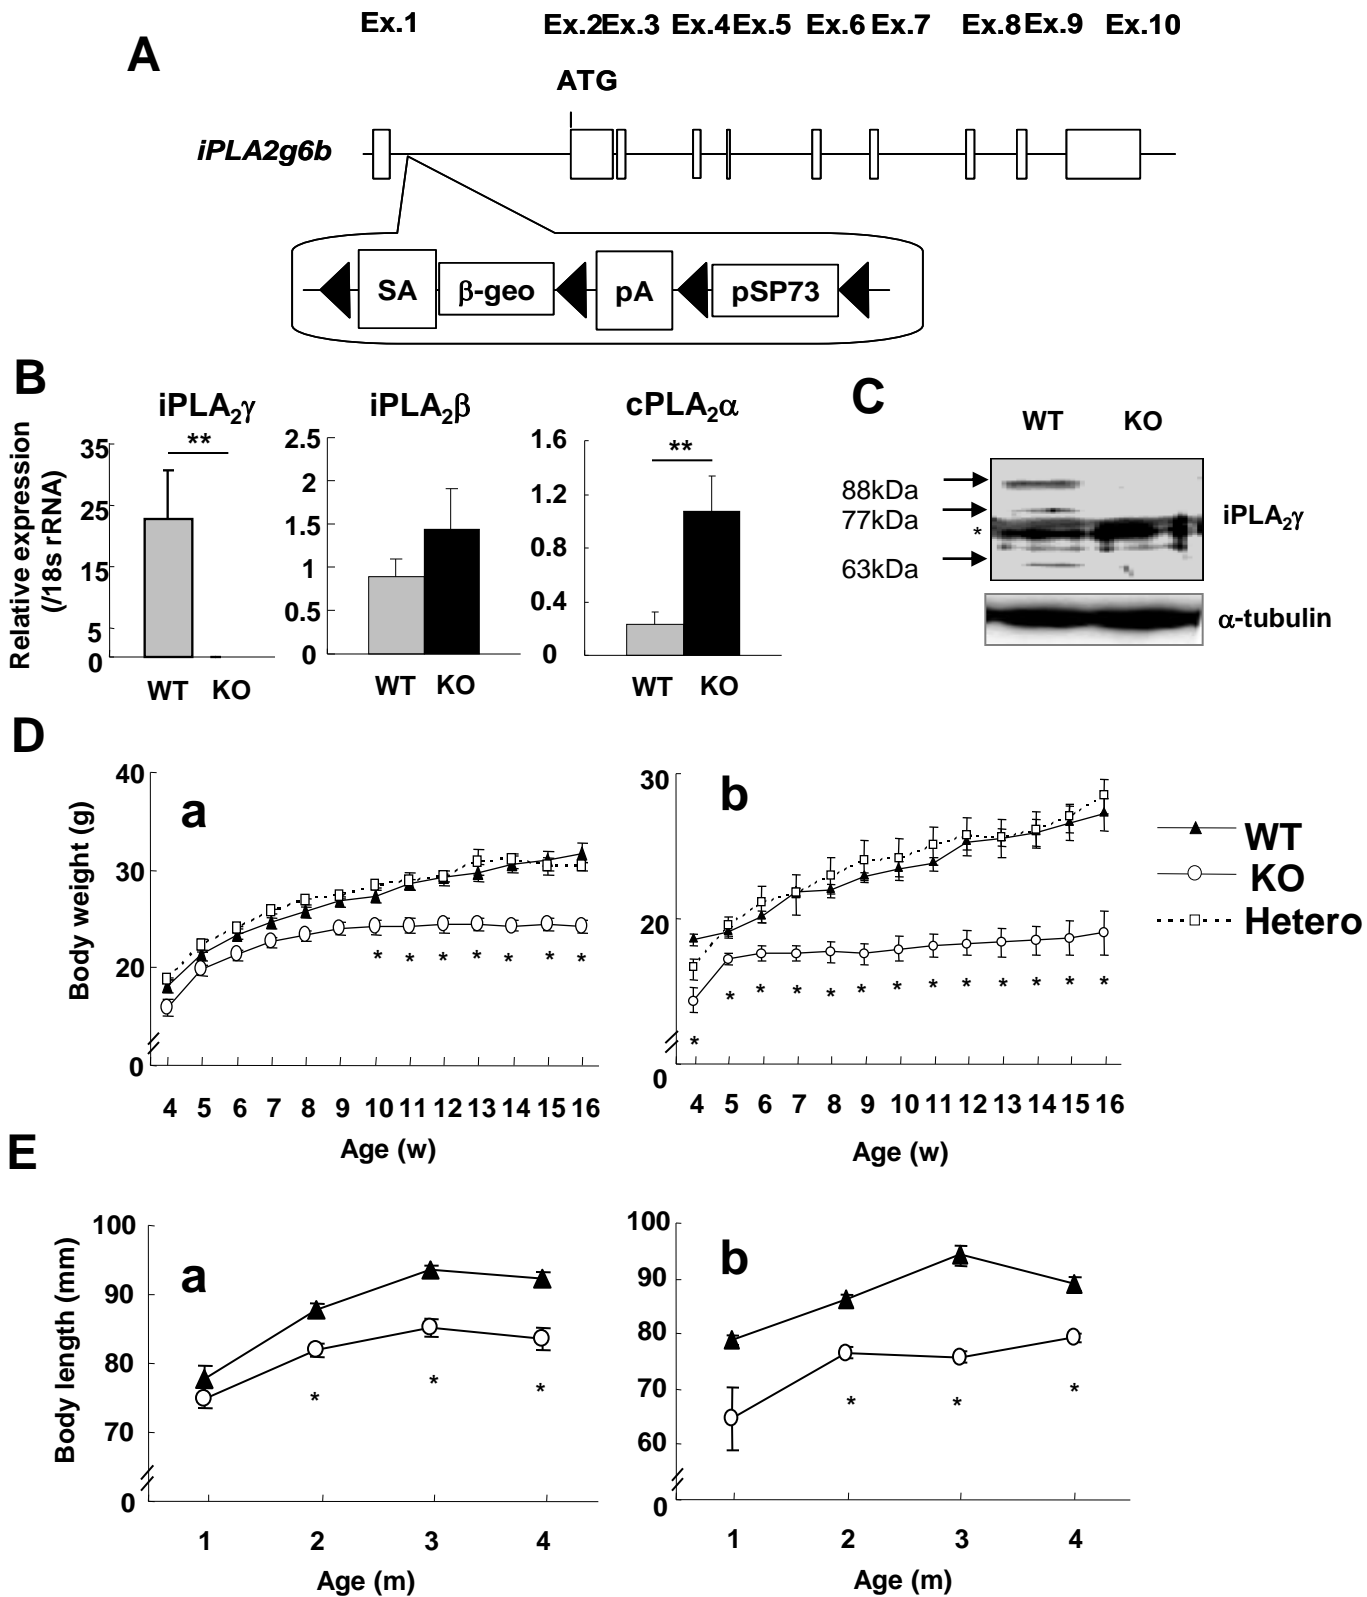

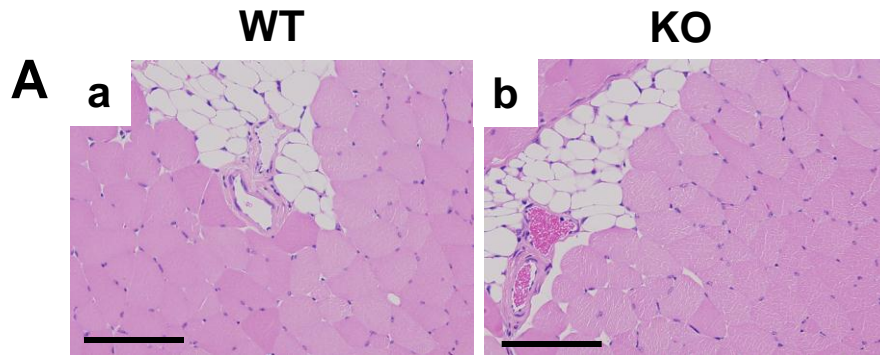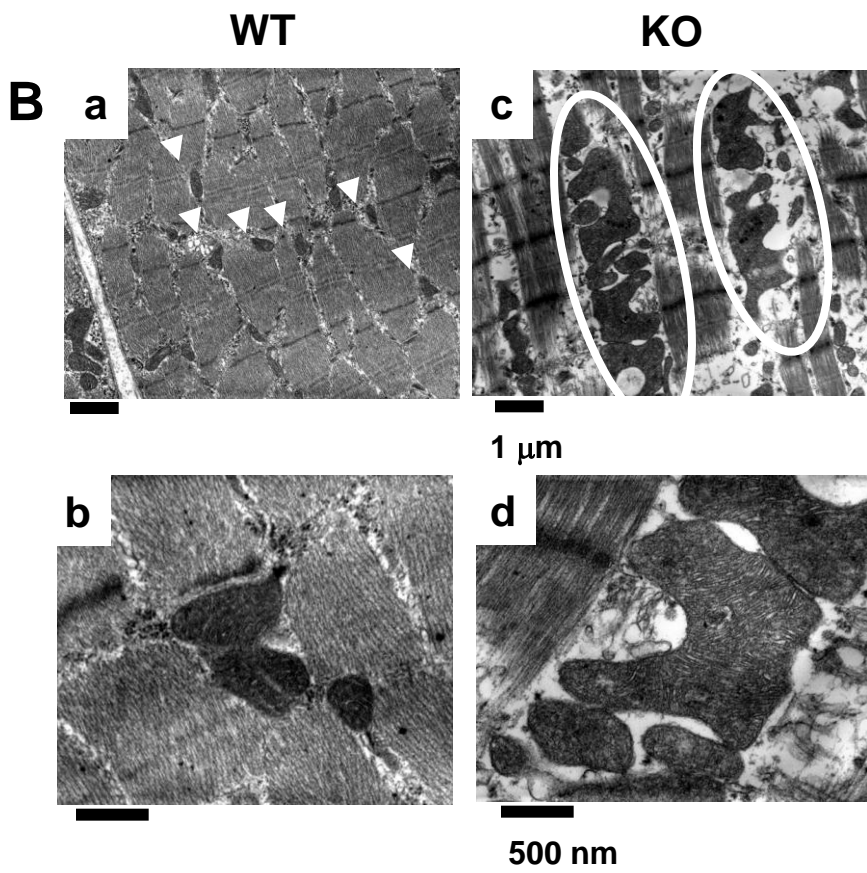

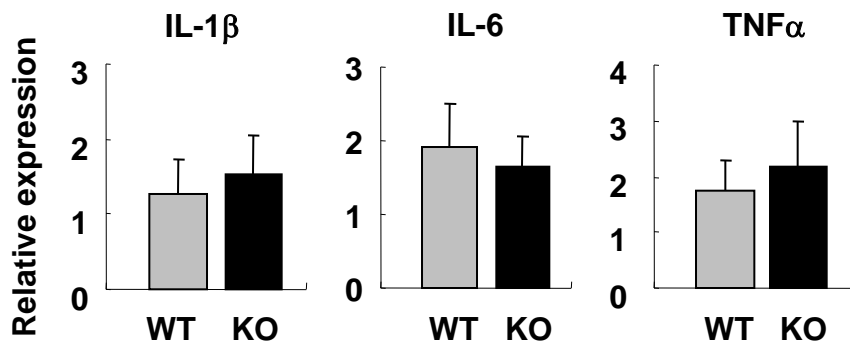

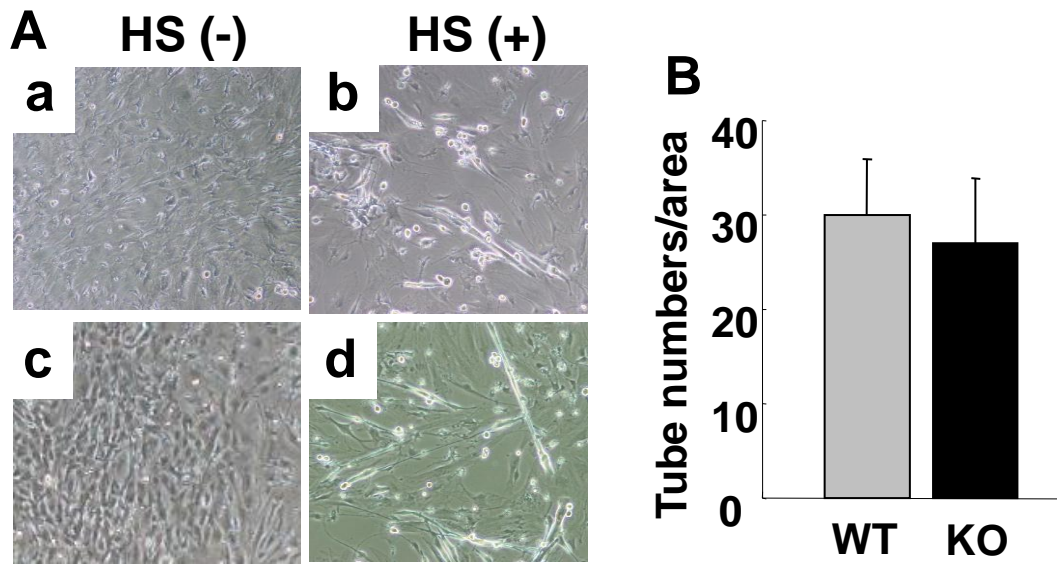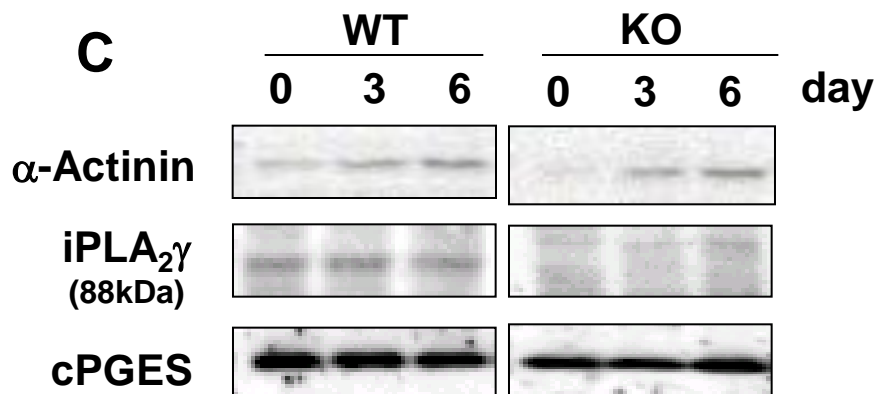

Supplement: supp_M008060_jlr.M008060-1.pdf [file supp_M008060_jlr.M008060-1.pdf]
